# Supplementary material for: Phosphorus-doped h-boron nitride as an efficient metal-free catalyst for direct dehydrogenation of ethylbenzene
Source: Royal Society of Chemistry journal article supplement (doi:10.1039/d1cy00903f), 2021-01-01
Supplement: d1cy00903f1.pdf [file d1cy00903f1.pdf]

## Supporting Information

### Phosphorus-doped h-Boron Nitride as an Efficient Metal-free Catalyst for Direct Dehydrogenation of Ethylbenzene

Baining Lin,<sup>a</sup> Fan Xu,<sup>a</sup> Yuxin Mei,<sup>a</sup> Yuwei Liu,<sup>a</sup> Yingping Zou,<sup>a</sup> Zhiwu Liang,<sup>b</sup> Yonghua Zhou,<sup>\*a</sup>

Jiangyong Diao,<sup>\*c</sup> Yu Mao,<sup>\*b</sup> Hongyang Liu <sup>\*c</sup>

<sup>a</sup> College of Chemistry and Chemical Engineering, Central South University, Changsha 410083, China

<sup>b</sup> College of Chemistry and Chemical Engineering, Hunan University, Changsha 410083, China

<sup>c</sup> Shenyang National Laboratory for Materials Science, Institute of Metal Research, Chinese Academy of Sciences, Shenyang 110016, China.

\*Corresponding authors:

[zhouyonghua@csu.edu.cn](mailto:zhouyonghua@csu.edu.cn) (Y. Zhou)

[jydiao@imr.ac.cn](mailto:jydiao@imr.ac.cn) (J. Diao)

[yumao@hnu.edu.cn](mailto:yumao@hnu.edu.cn) (Y. Mao)

[liuhy@imr.ac.cn](mailto:liuhy@imr.ac.cn) (H. Liu)

## Table

**Table S1** Specific activity per surface area of h-BN and PBN-x catalysts.

| Sample  | Specific surface area<br>( $S_{\text{BET}}$ , $\text{m}^2\cdot\text{g}^{-1}$ ) | Styrene rate<br>( $\mu\text{mol}_{\text{ST}}\cdot\text{m}^{-2}\cdot\text{h}^{-1}$ ) |
|---------|--------------------------------------------------------------------------------|-------------------------------------------------------------------------------------|
| h-BN    | 219.4                                                                          | 9.57                                                                                |
| PBN-0.2 | 240.7                                                                          | 11.67                                                                               |
| PBN-1.0 | 288.3                                                                          | 28.75                                                                               |
| PBN-1.2 | 312.3                                                                          | 55.87                                                                               |
| PBN-1.4 | 317.8                                                                          | 25.05                                                                               |

## Figures

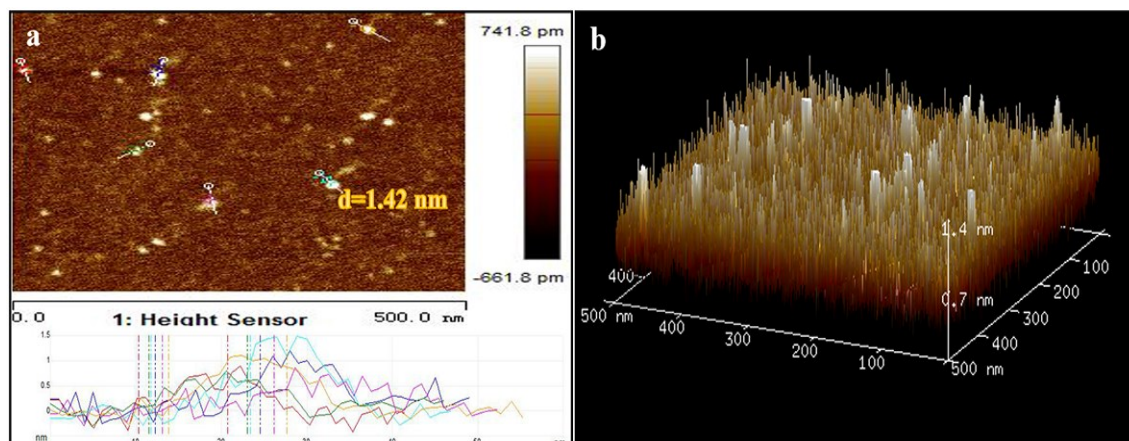

Fig. S1 AFM images of the PBN-1.2 sample.

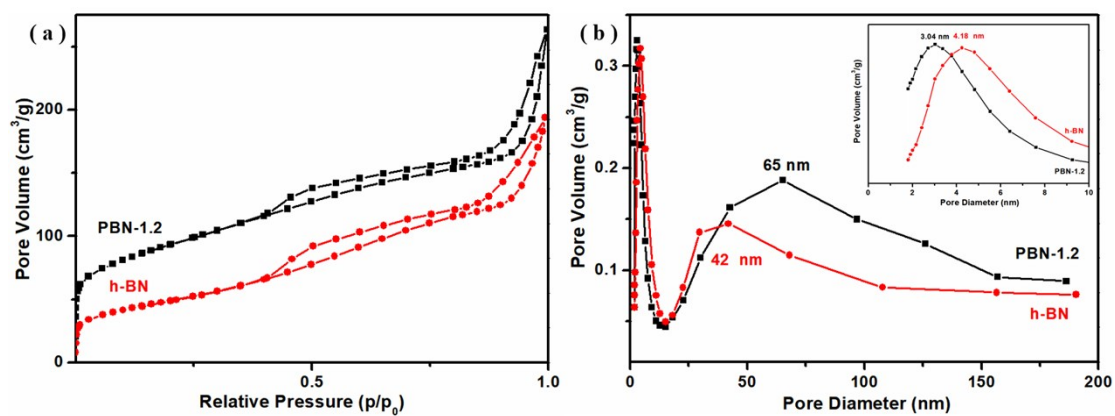

Fig. S2 Adsorption-desorption isotherm and BJH pore-size distribution curve of the PBN-1.2 and h-BN sample.

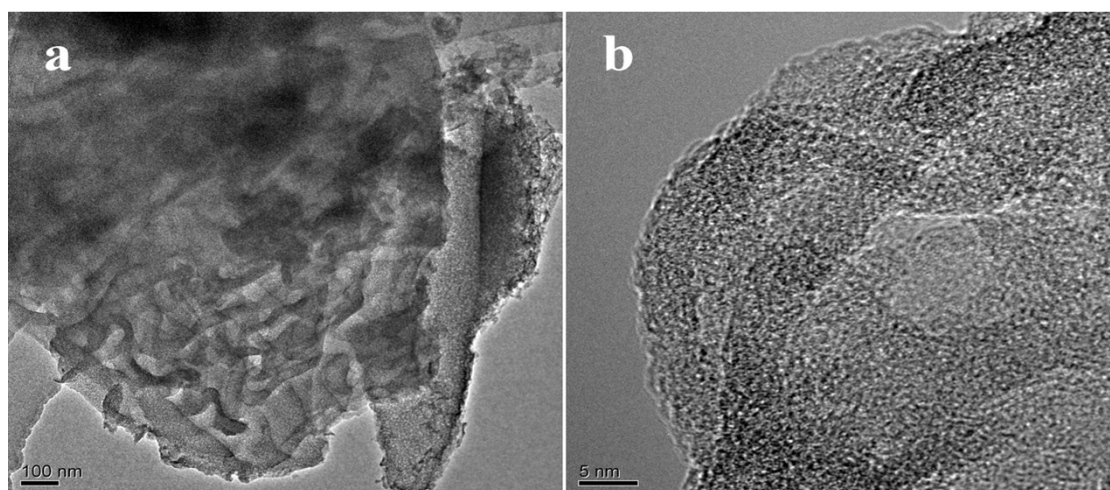

Fig. S3 HRTEM images of the h-BN sample.

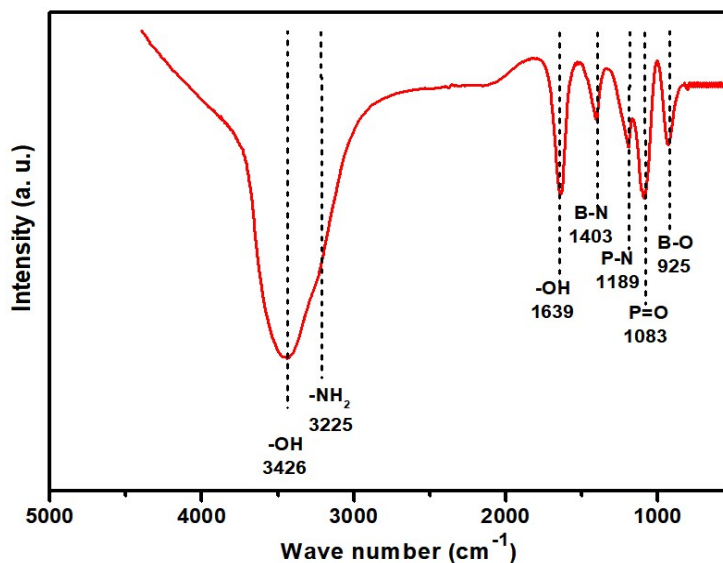

**Fig. S4** FT-IR spectrum of PBN-1.2 sample.

According to reference,<sup>1</sup> in Fig. S4, the broad peak at 3225  $\text{cm}^{-1}$  is ascribed to the stretching vibration of the  $-\text{NH}_2$  group. Two bands at 1403 and 799  $\text{cm}^{-1}$  correspond to the in plane B-N transverse stretching vibration and the out-of plane B-N-B bending vibration, respectively. The peak at 925  $\text{cm}^{-1}$  is ascribed to the B-O vibration. The peaks at 1639 and 3426  $\text{cm}^{-1}$  are attributed to the bending and stretching vibrations of the  $-\text{OH}$  group, respectively. After phosphor doping, the B-N, B-N-B, and B-O vibration modes are still dominant, indicating a backbone role of the B-N networks for the PBN samples. Moreover, new peaks at 1083 and 1189  $\text{cm}^{-1}$  attributed to the P=O and P-N stretching vibrations appear for PBN. In addition, due to the stronger electronegativity of phosphor than boron, the in-plane B-N transverse stretching vibration shifts from 1380  $\text{cm}^{-1}$  to a higher value of 1400  $\text{cm}^{-1}$ .

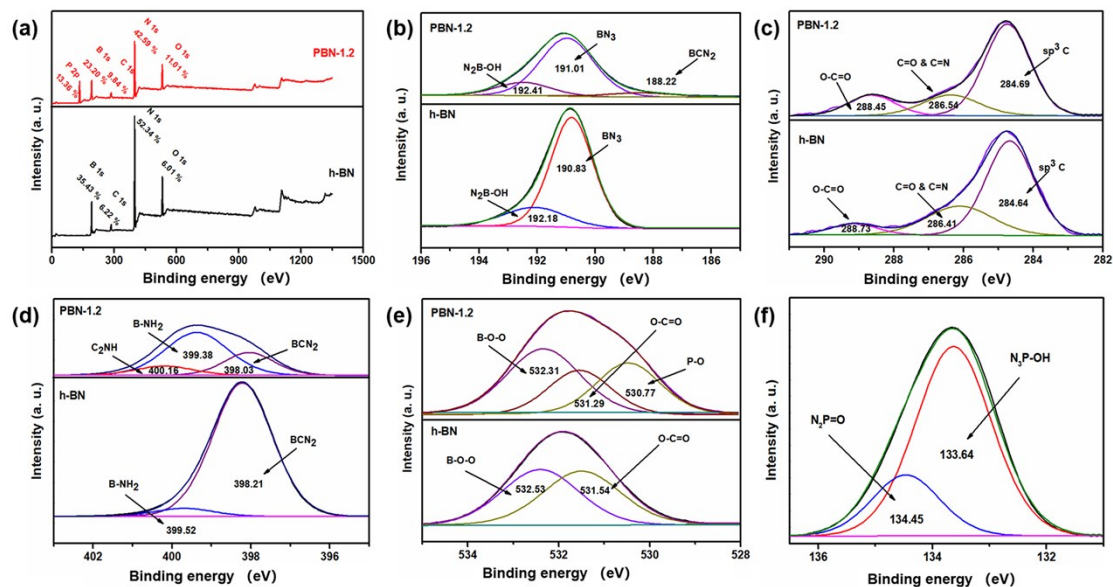

**Fig. S5** (a) The survey, (b) deconvolution of B 1s, (c) C 1s, (d) N 1s, (e) O 1s spectra of PBN-1.2 and h-BN samples, and deconvolution of (f) P 2p spectrum of the PBN-1.2 sample.

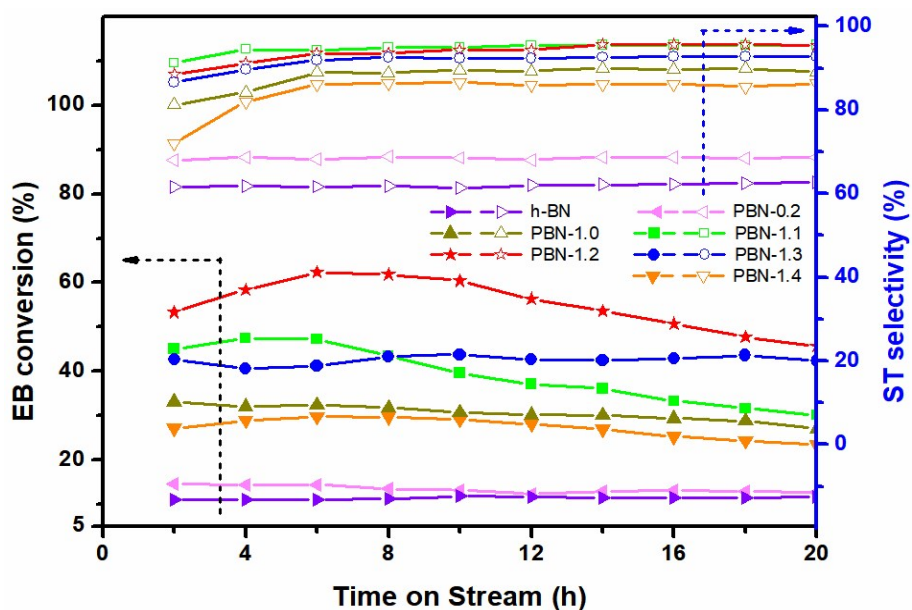

**Fig. S6** The catalytic performance of PBN-x samples for DDH of ethylbenzene to styrene. Reaction conditions: 50mg catalyst diluted with 2mL arenaceous quartz, 600 °C, 2.8% ethylbenzene in  $N_2$ , 20 mL·min<sup>-1</sup>.

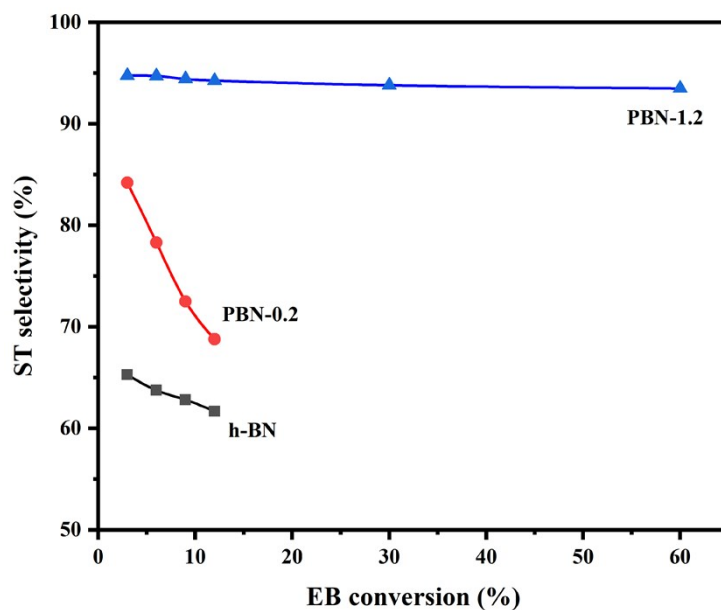

**Fig. S7** Styrene selectivity versus ethylbenzene conversion obtained by variation of reaction temperature. Reaction conditions: 50mg catalyst diluted with 2mL arenaceous quartz, 500-600 °C, 2.8% ethylbenzene in N<sub>2</sub>, 20 mL·min<sup>-1</sup>.

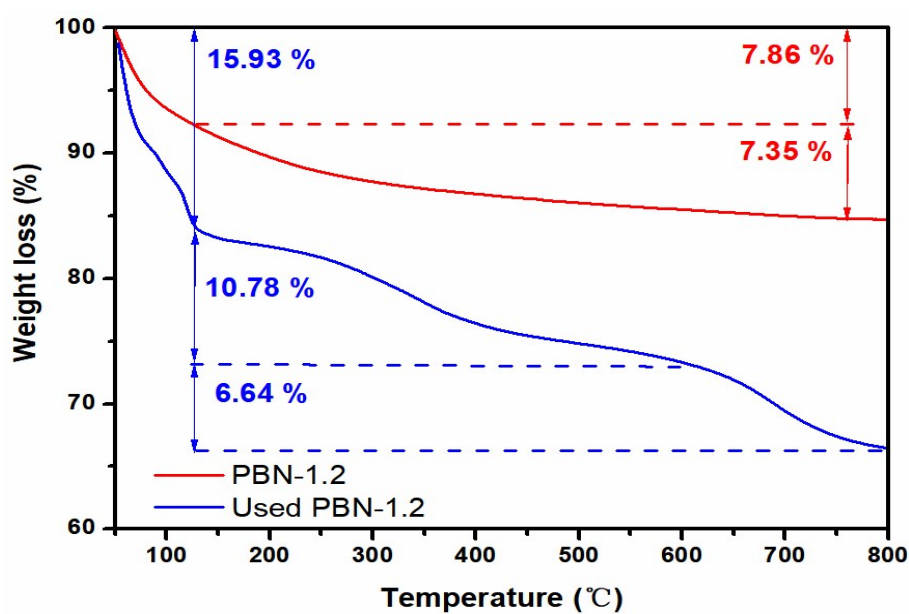

**Fig. S8** TGA curves of the PBN-1.2 catalyst before and after reaction.



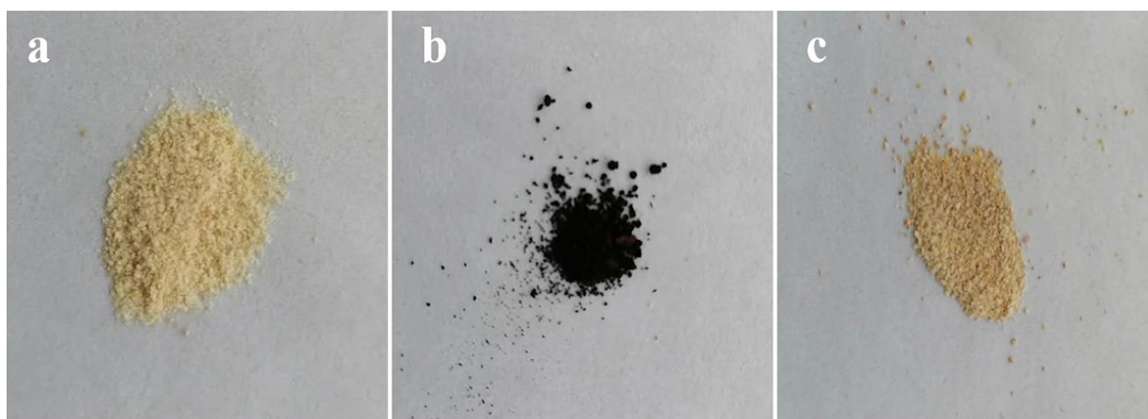

**Fig. S9** Photo images of (a) fresh and (b) used PBN-1.2 catalyst, and (c) Reg-PBN-1.2 catalyst.

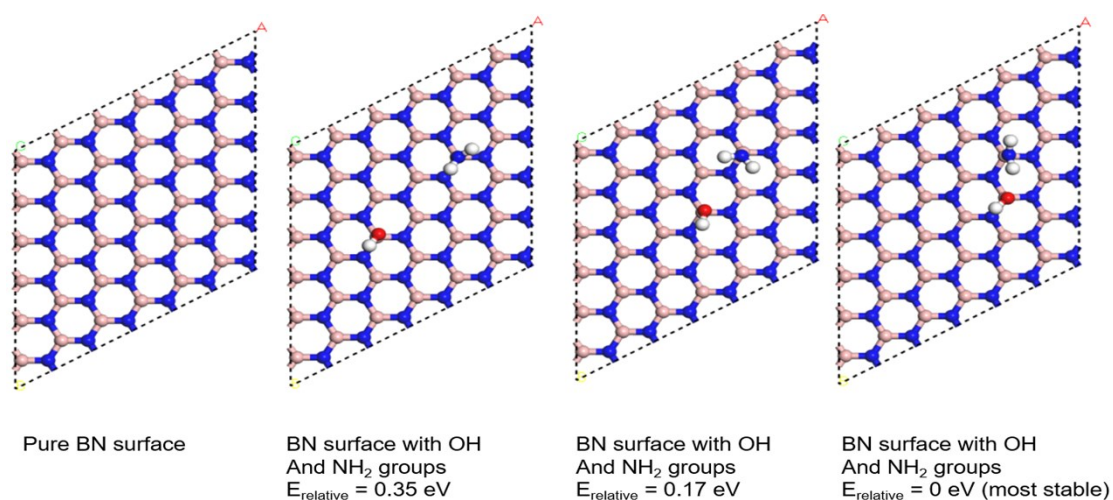

**Fig. S10** The structure of the pure h-BN surface and h-BN surfaces with OH and  $\text{NH}_2$  groups. The one with the lowest relative energy is chosen for further investigation. The white, blue, pink and red balls represent H, N, B and O atoms, respectively.

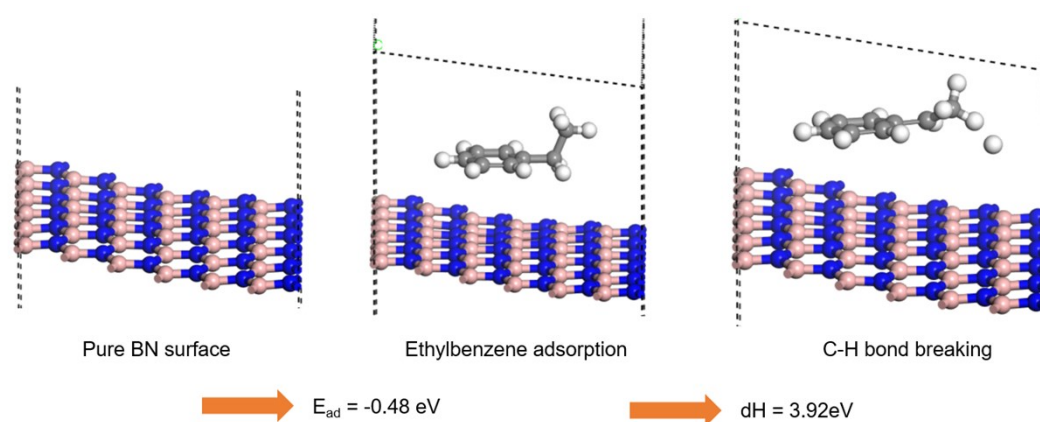

**Fig. S11** Ethylbenzene adsorption and following C-H bond breaking over pure h-BN surface. The white, blue, pink and gray balls represent H, N, B and C atoms, respectively.

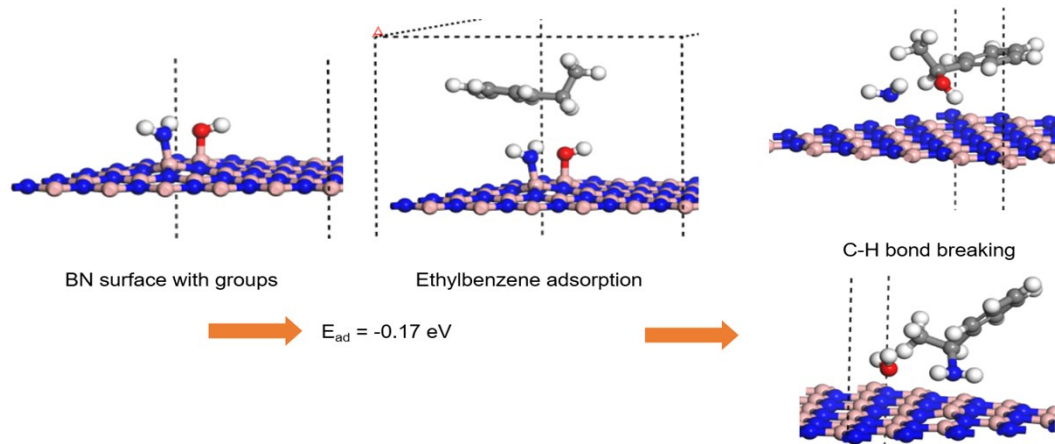

**Fig. S12** Ethylbenzene adsorption and following C-H bond breaking over h-BN surface with OH and NH<sub>2</sub> groups. The white, blue, pink, red and gray balls represent H, N, B, O and C atoms, respectively.

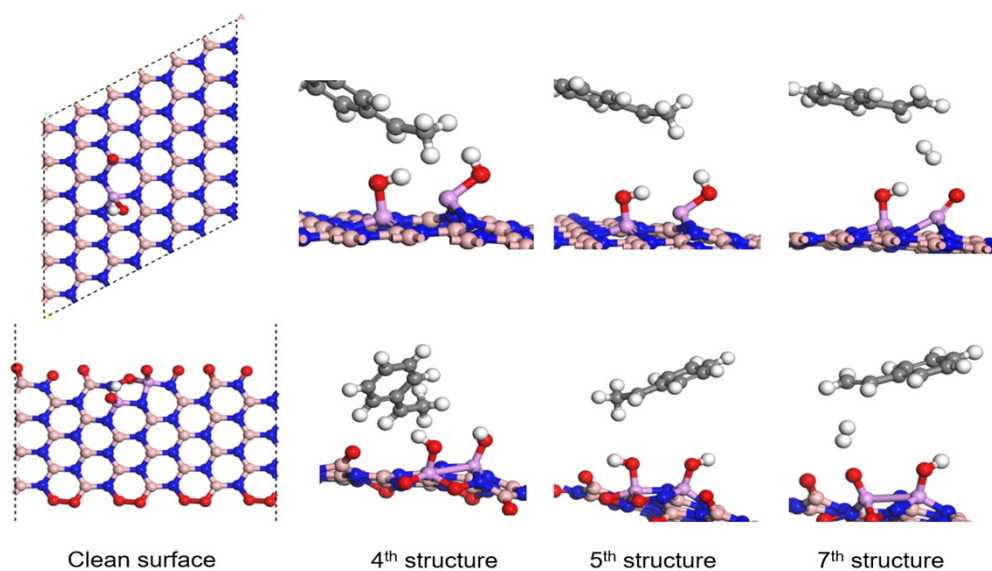

**Fig. S13** Remaining structures in Fig. 6 of the main text. Upper half for basal PBN plane while lower half for PBN armchair band. The white, blue, pink, purple, red and gray balls represent H, N, B, P, O and C atoms, respectively.



## References

- 1 J. Zhao, B. Lin, Y. Zhu, Y. Zhou, H. Liu, *Catal. Sci. Technol.*, 2018, **8**, 5900-5905.
